# Supplementary material for: Cigarette smoke condensate induces centrosome clustering in normal lung epithelial cells
Source: PubMed Central journal article supplement (PMC10134322; doi:10.1002/cam4.5599), 2023-01-09

## Supple Figure-2

**A**

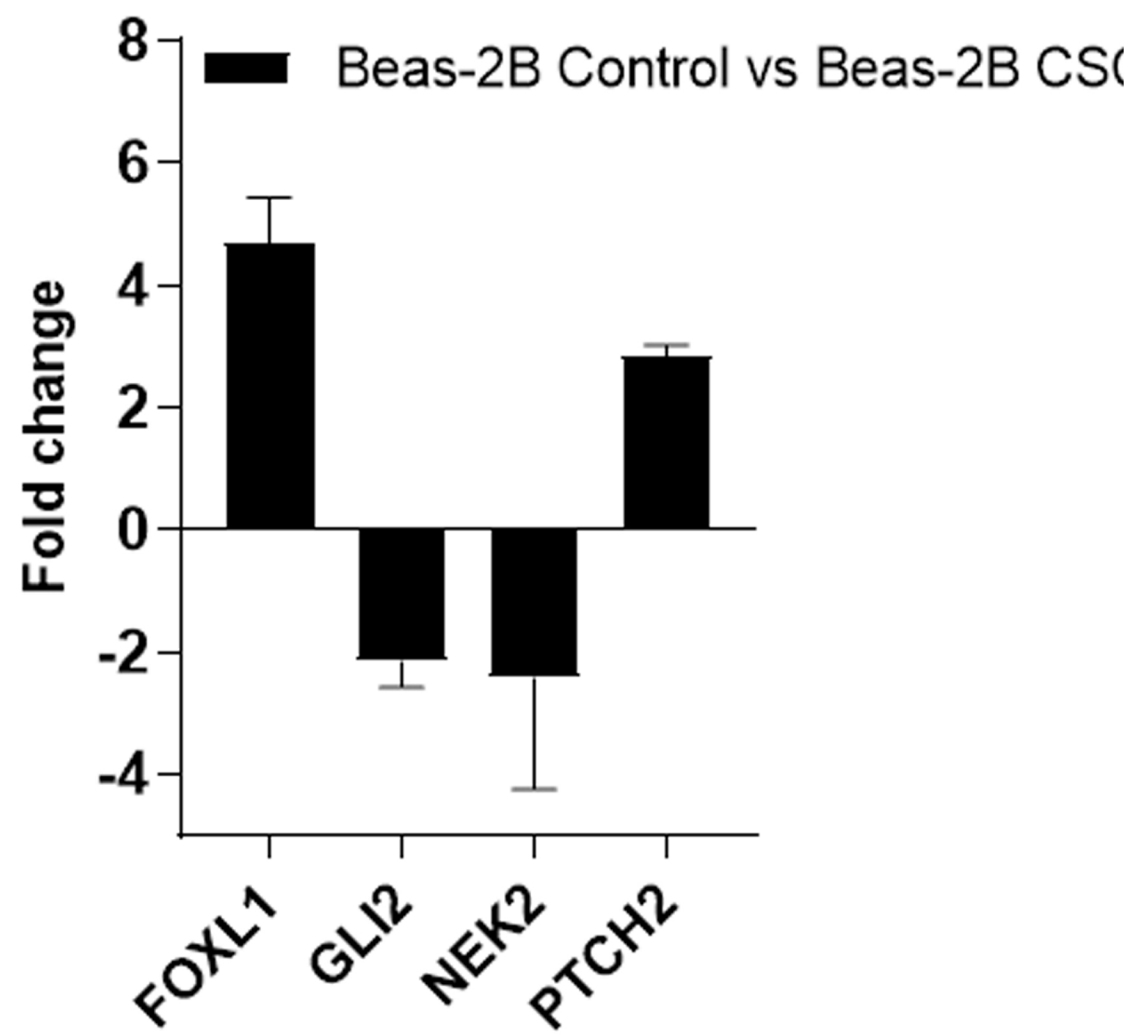

**B**

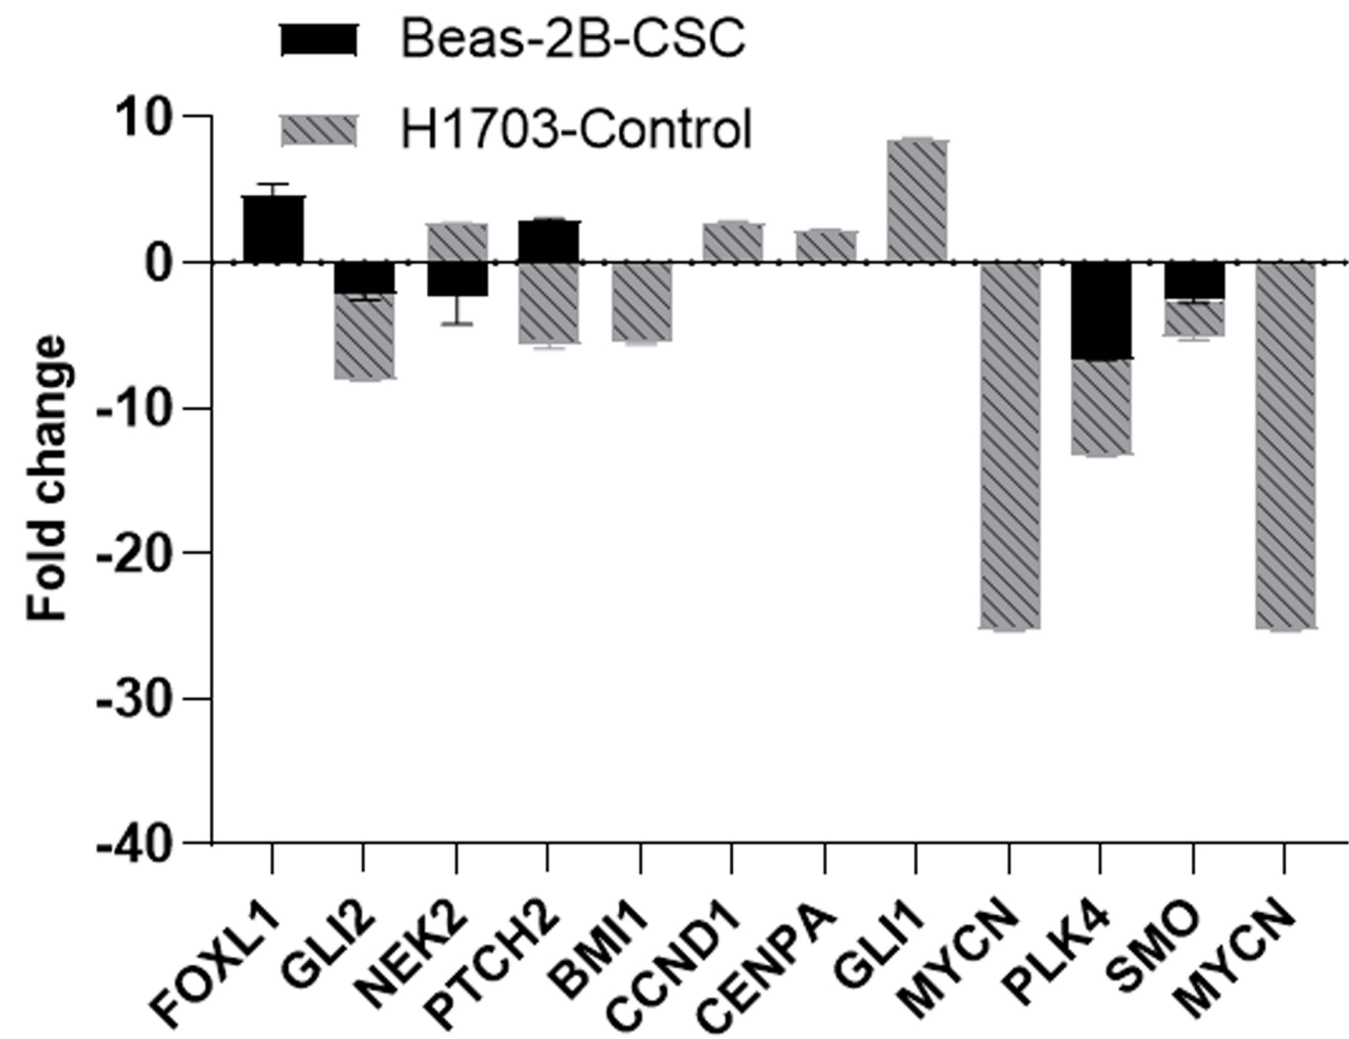

**C**

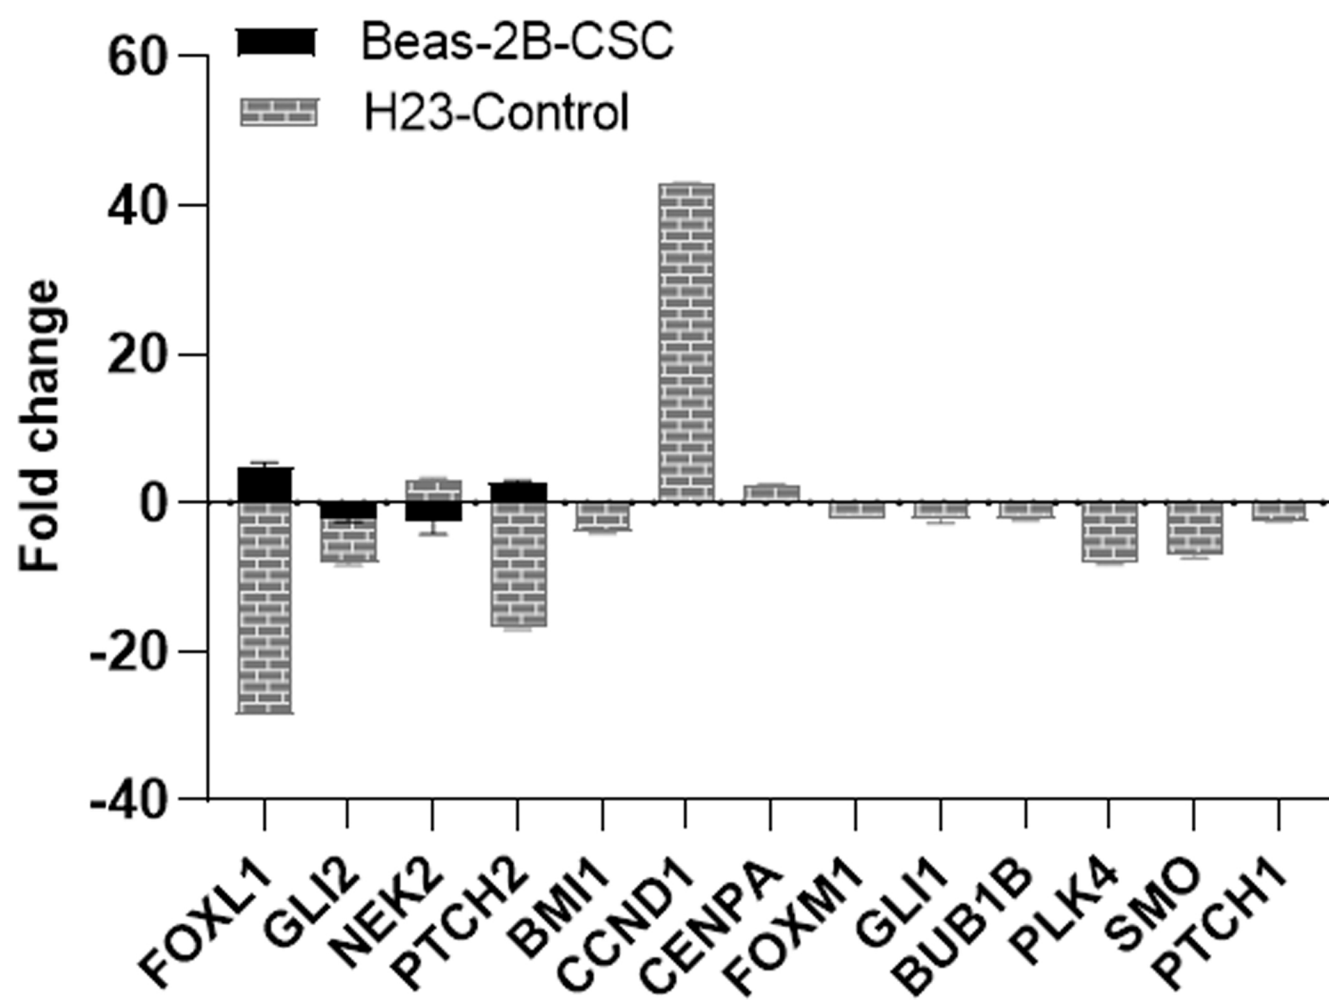

**D**

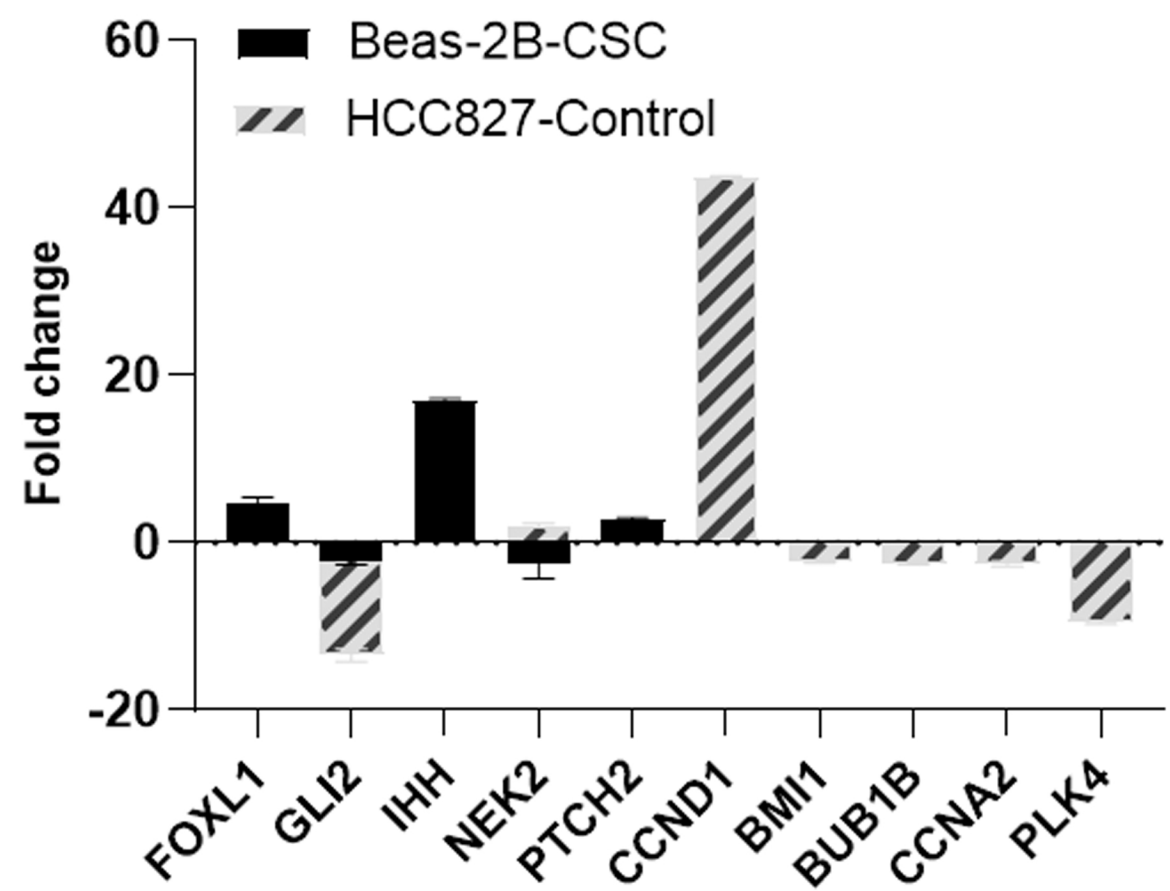

Supplement: CAM4-12-8499-s001.pdf [file CAM4-12-8499-s001.pdf]
